# Supplementary material for: Voltage-dependent activation of Rac1 by Nav1.5 channels promotes cell migration
Source: bioRxiv or medRxiv preprint supplement (doi:10.1101/597088), 2019-08-09

## Supplementary Figure Legends

**Figure S1.** Effects of sodium citrate and phenytoin on the membrane potential. (A)  $V_m$  in control physiological saline solution, after perfusion with the vehicle for TTX (148  $\mu$ M sodium citrate, pH = 4.8) and following washout. Solid line, mean; gray shading, SEM (n = 13). (B) Quantification of  $V_m$  over the last 5 s in control, sodium citrate, and washout (n = 13). (C) Representative trace showing the inhibitory effect of phenytoin (100  $\mu$ M) on  $\text{Na}^+$  current, and recovery after washout. The cell was held at -120 mV for 250 ms before depolarizing to -10 mV for 50 ms. (D) Expanded view of persistent  $\text{Na}^+$  current 40-45 ms following onset of depolarization. (E) Quantification of the normalized transient  $\text{Na}^+$  current elicited by depolarizing to -10 mV from a holding potential of -120 mV (n = 9). (F) Quantification of the normalized persistent  $\text{Na}^+$  current 40-45 ms after depolarizing to -10 mV from a holding potential of -120 mV (n = 4). (G) Quantification of the normalized transient  $\text{Na}^+$  current elicited by depolarizing to -10 mV from a holding potential of -80 mV (n = 4). (H) Quantification of the normalized persistent  $\text{Na}^+$  current 40-45 ms after depolarizing to -10 mV from a holding potential of -80 mV (n = 3). (I)  $V_m$  in control physiological saline solution, after phenytoin (100  $\mu$ M) treatment and following washout. Solid line, mean; gray shading, SEM (n = 12). (J) Quantification of  $V_m$  over the last 5 s in control, phenytoin, and washout (n = 12). (K) Quantification of  $V_m$  over the last 5 s in control, NaOH (75  $\mu$ M; vehicle for phenytoin) and washout (n = 9). Data are mean and SEM. \*P < 0.05; \*\*P < 0.01; \*\*\*P < 0.001; repeated measures ANOVA with Tukey test.

**Figure S2.** Effects of veratridine on  $\text{Na}^+$  current and NMDG on membrane potential. (A) I-V relationship for transient  $\text{Na}^+$  current in control physiological saline solution and following perfusion of veratridine (100  $\mu$ M) (n = 6). (B) I-V relationship for persistent  $\text{Na}^+$  current (defined as mean current density 45-50 ms following onset of depolarization; n = 6). Data are mean and SEM. Consistent with previous reports [1,2], veratridine caused a small reduction in the transient peak  $\text{Na}^+$  current density but increased the peak persistent  $\text{Na}^+$

current density. (C)  $V_m$  in control physiological saline solution, after extracellular  $\text{Na}^+$  replacement with N-methyl-D-glucamine (NMDG) and following washout. Solid line, mean; gray shading, SEM (n = 7). (D) Quantification of  $V_m$  over the last 5 s in control, NMDG, and washout (n = 7).

**Figure S3.** Tetrodotoxin and NS-1619 do not affect the intracellular  $\text{Ca}^{2+}$  level. (A) Intracellular  $\text{Ca}^{2+}$  level (340/380 ratio) following perfusion with TTX (30  $\mu\text{M}$ ). Solid line, mean; gray shading, SEM (n = 55). (B) 340/380 ratio over the last 30 s in control, TTX and washout (n = 3). (C) Intracellular  $\text{Ca}^{2+}$  level (340/380 ratio) following pre-treatment with TTX (30  $\mu\text{M}$ ) for 48 h (n = 55). (D) 340/380 ratio over the last 30 s of TTX and washout (n = 3). (E) Intracellular  $\text{Ca}^{2+}$  level (340/380 ratio) following perfusion with NS-1619 (1  $\mu\text{M}$ ). Solid line, mean; gray shading, SEM (n = 40). (F) 340/380 ratio over the last 30 s in control, NS-1619 and washout (n = 3). Ionomycin was used at the end of all experiments as a positive control confirming sensitivity of the  $\text{Ca}^{2+}$  indicator. Data are mean and SEM.

**Figure S4.** Effect of tetrodotoxin and NS-1619 on proliferation and invasion. (A) Proliferation (quantified as number of cells using the MTT assay) following treatment for 24 h with NS-1619 (1  $\mu\text{M}$ , 40  $\mu\text{M}$ ) or vehicle (n = 3). (B) Matrigel invasion  $\pm$  NS-1619 (1  $\mu\text{M}$ ) or TTX (30  $\mu\text{M}$ ), normalized to control (n = 4). (C) Matrigel invasion  $\pm$  NS-1619 (40  $\mu\text{M}$ ), normalized to control (n = 3). Data are mean and SEM. \*P < 0.05; \*\*P < 0.01; repeated measures ANOVA with Tukey test.

**Figure S5.** Dose-dependent effect of EHT1864 on cell morphology. (A) Circularity of cells after treatment with EHT1864 (0.5-10  $\mu\text{M}$ ) or vehicle for 3 h (n  $\geq$  277). (C) Feret's diameter ( $\mu\text{m}$ ) of cells after treatment with EHT1864 (0.5-10  $\mu\text{M}$ ) or vehicle for 3 h (n  $\geq$  277). Data are mean and SEM.

## References

1. Ulbricht W (1998) Effects of veratridine on sodium currents and fluxes. *Rev Physiol Biochem Pharmacol* 133:1-54
2. Ulbricht W (1969) The effect of veratridine on excitable membranes of nerve and muscle. *Ergeb Physiol* 61:18-71

Figure S1

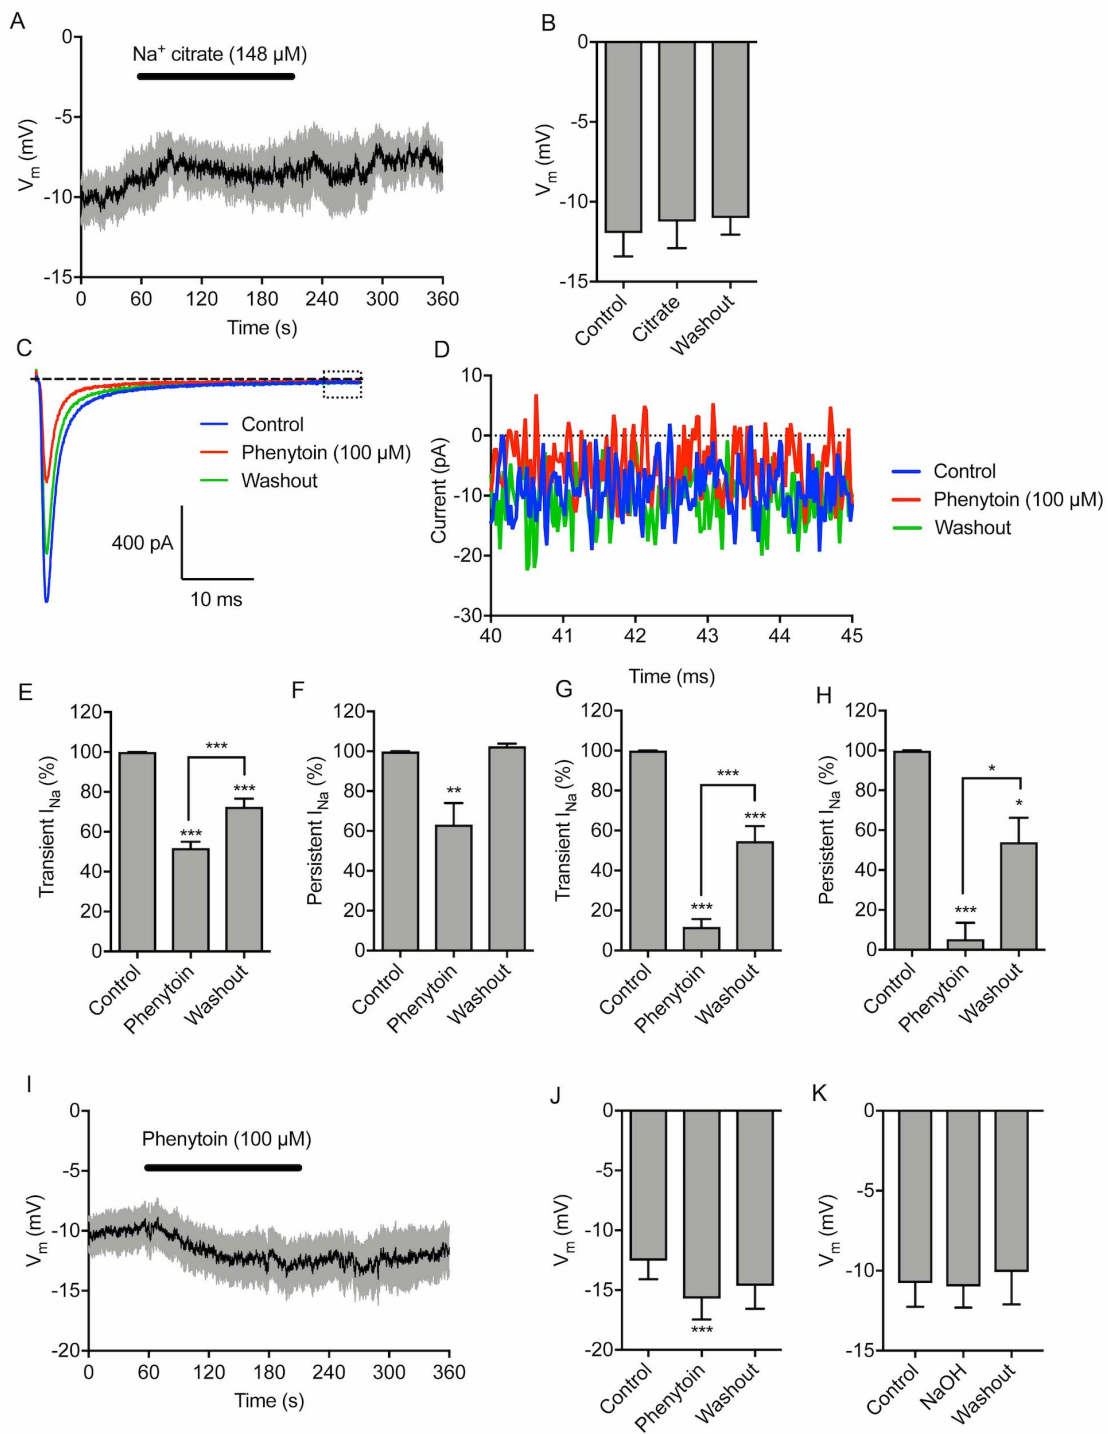

Figure S2

A

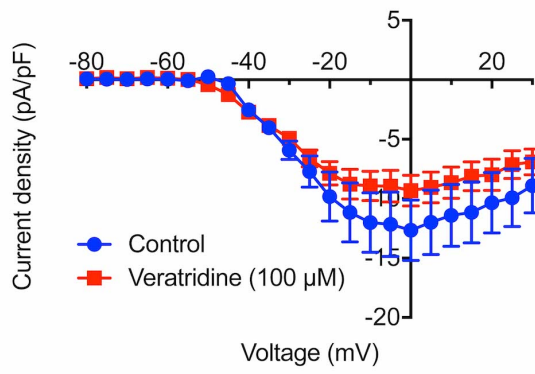

B

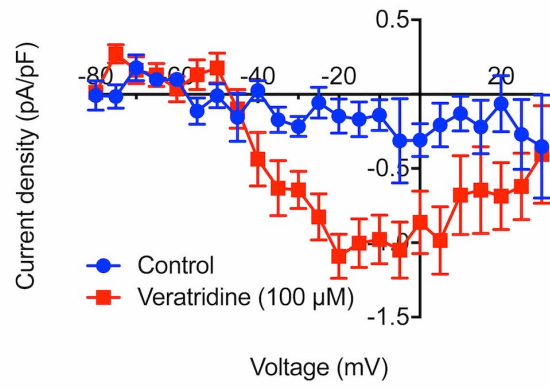

C

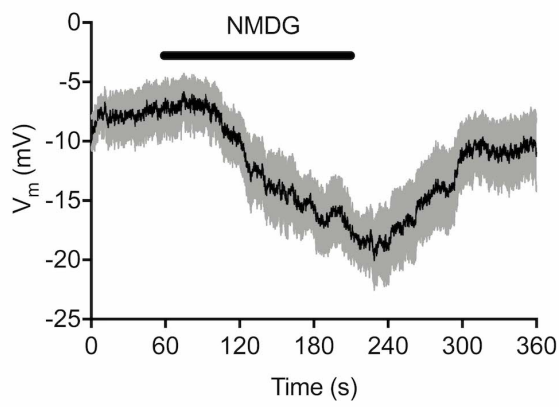

D

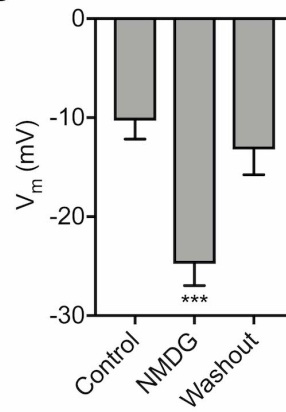

Figure S3

A

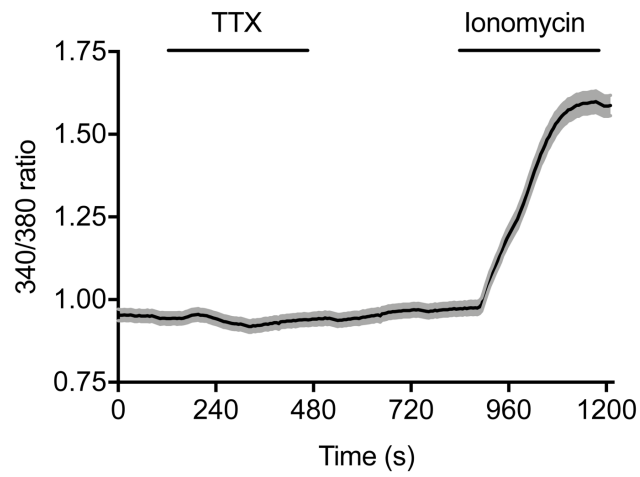

B

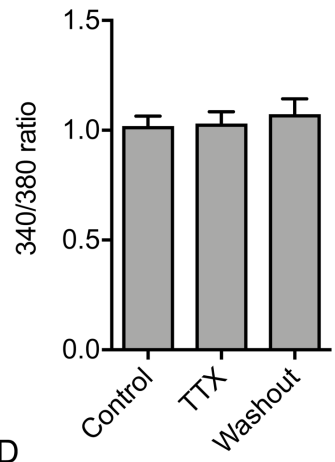

C

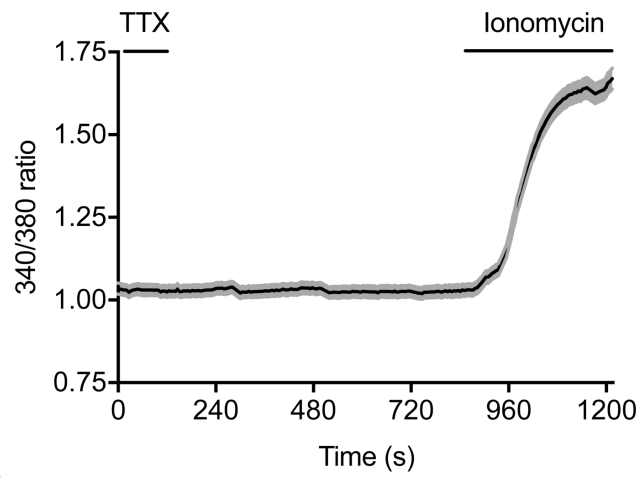

D

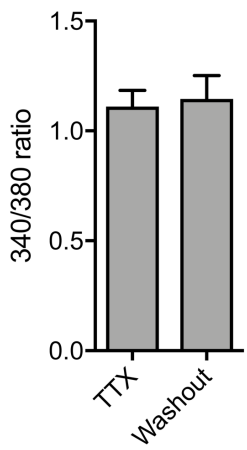

E

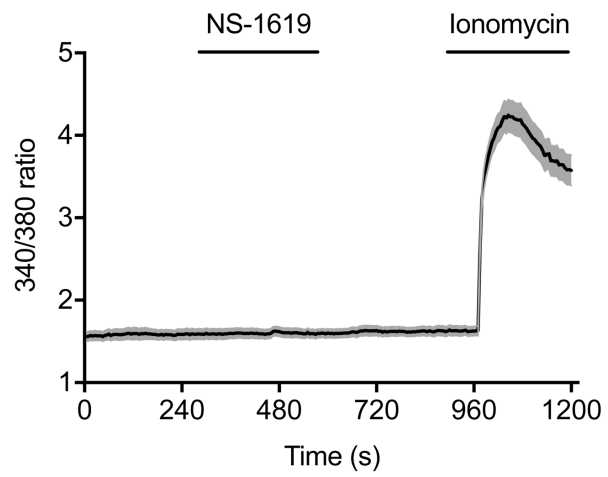

F

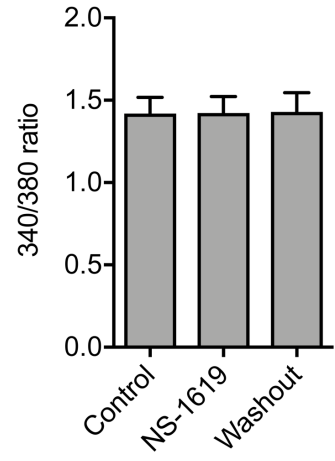

Figure S4

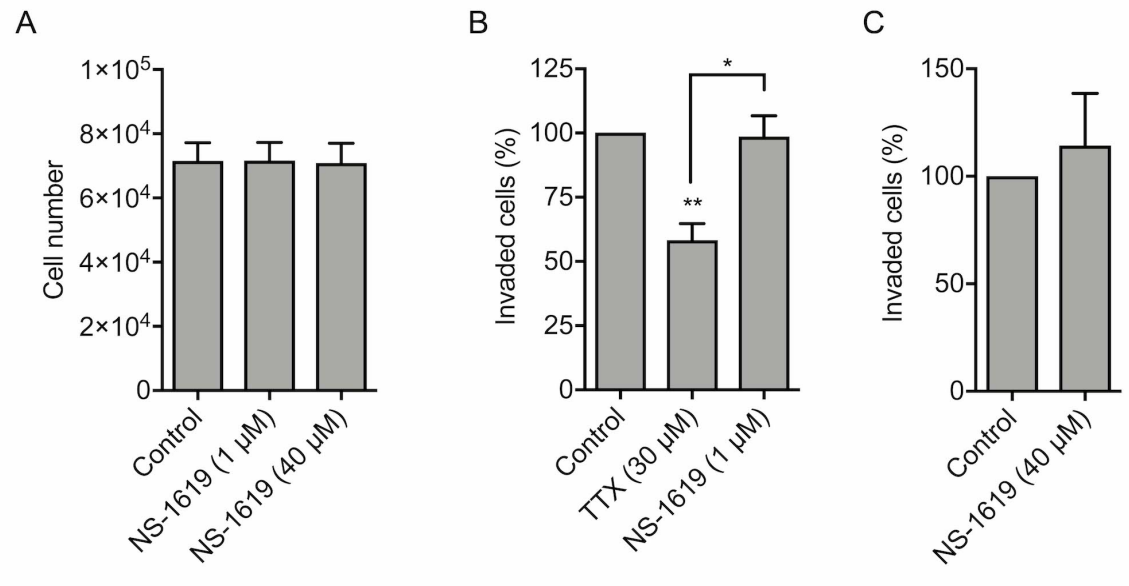

Figure S5

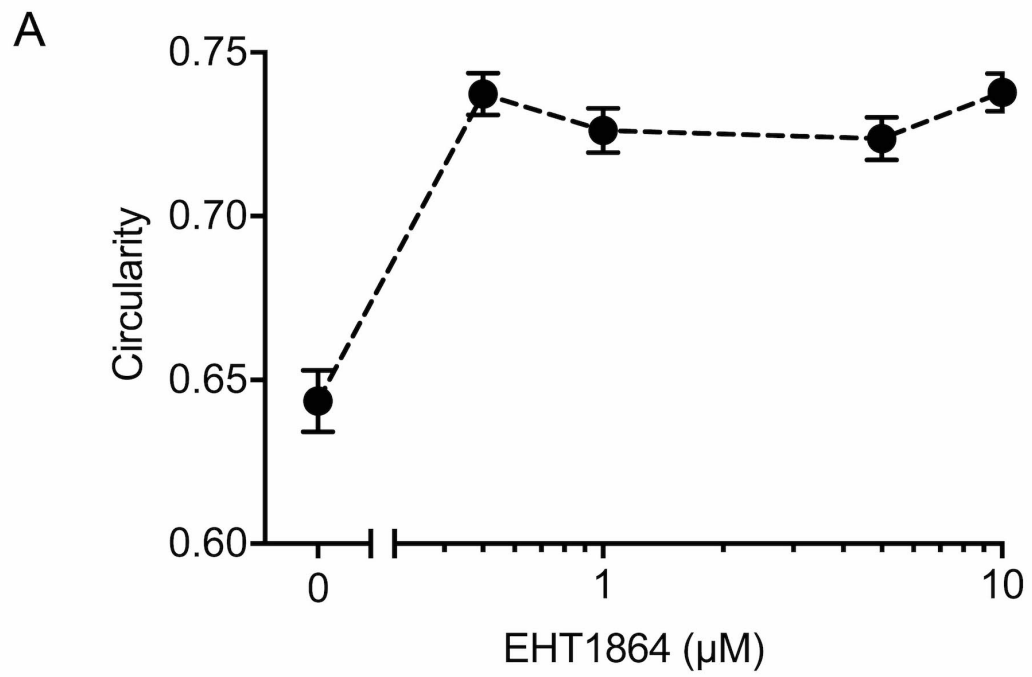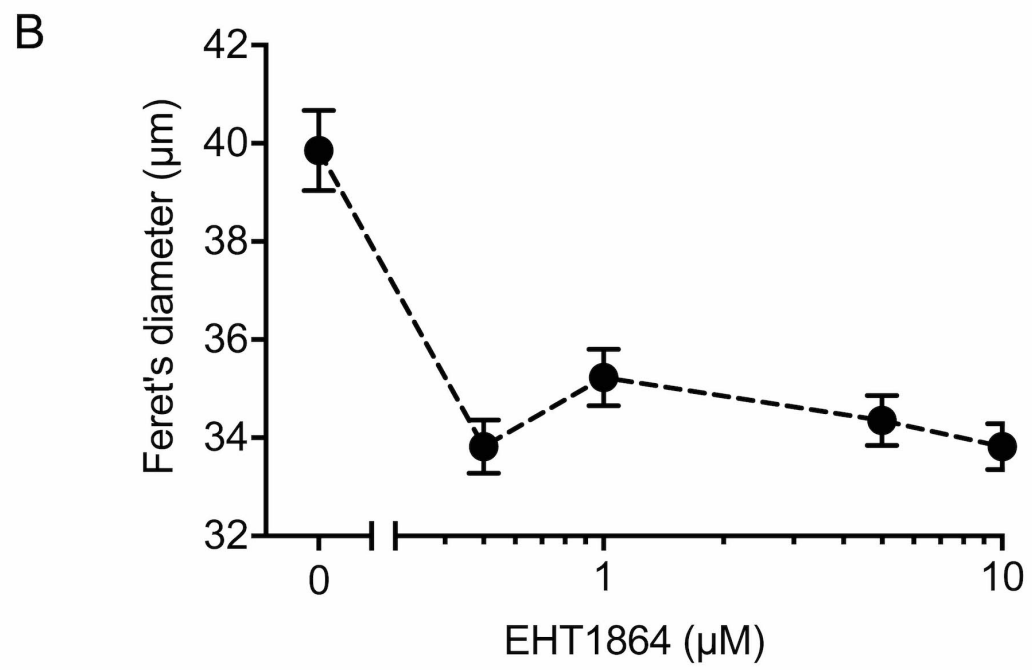

Supplement: Supplementary file [file media-1.pdf]
